# Supplementary material for: Characterization of the TCP Gene Family in Chrysanthemum nankingense and the Role of CnTCP4 in Cold Tolerance
Source: MDPI journal article supplement (doi:10.3390/plants11070936), 2022-03-30
Supplement: s1 [file s1]

Motifs Found

|   |                                                                                     |                   |
|---|-------------------------------------------------------------------------------------|-------------------|
| + |    |                   |
| + |    | A-box             |
| + |    | AAGAA-motif       |
| + |    | ABRE              |
| + |    | ABRE3a            |
| + |    | ABRE4             |
| + |    | ARE               |
| + |    | ATCT-motif        |
| + |    | AT~TATA-box       |
| + |    | Box 4             |
| + |    | CAAT-box          |
| + |    | CCGTCC motif      |
| + |    | CCGTCC-box        |
| + |    | CGTCA-motif       |
| + |    | CTAG-motif        |
| + |    | DRE1              |
| + |    | G-box             |
| + |    | GATA-motif        |
| + |   | GCN4_motif        |
| + |  | GT1-motif         |
| + |                                                                                     | I-box             |
| + |  | LAMP-element      |
| + |  | MBS               |
| + |  | MRE               |
| + |  | MYB               |
| + |  | MYB-like sequence |
| + |  | MYC               |
| + |  | Myb               |
| + |  | Myb-binding site  |
| + |  | O2-site           |
| + |  | P-box             |
| + |  | TATA              |
| + |  | TATA-box          |
| + |  | TCA               |
| + |  | TCA-element       |
| + |  | TCCC-motif        |
| + |  | TGACG-motif       |
| + |  | Unnamed__1        |
| + |  | Unnamed__16       |
| + |  | Unnamed__4        |
| + |  | Unnamed__6        |
| + |                                                                                     | W box             |

- +  WRE3
- +  WUN-motif
- +  Y-box
- +  as-1

Motifs Found

- + 
- +  4cl-CMA2b
- +  AAGAA-motif
- +  ABRE
- +  ABRE3a
- +  ABRE4
- +  ARE
- +  AT-rich sequence
- +  ATC-motif
- +  AT~TATA-box
- +  Box 4
- +  CAAT-box
- +  CARE
- +  CAT-box
- +  CGTCA-motif
- +  G-box
- +  GC-motif
- +  GCN4\_motif
- +  GT1-motif
- +  LAMP-element
- +  LTR
- +  MBS
- +  MBSI
- +  MRE
- +  MYB
- +  MYB-like sequence
- +  MYC
- +  Myb
- +  Myb-binding site
- +  Myc
- +  STRE
- +  TATA-box
- +  TC-rich repeats
- +  TCA-element
- +  TCT-motif
- +  TGACG-motif
- +  Unnamed\_\_1
- +  Unnamed\_\_2
- +  Unnamed\_\_4
- +  W box
- +  WUN-motif
- +  as-1

+  chs-Unit 1 ml

Motifs Found

- + 
- +  AAGAA-motif
- +  ABRE
- +  ARE
- +  ATC-motif
- +  AT~TATA-box
- +  Box 4
- +  Box III
- +  CAAT-box
- +  CGTCA-motif
- +  DRE core
- +  ERE
- +  G-Box
- +  G-box
- +  GARE-motif
- +  GT1-motif
- +  I-box
- +  MRE
- +  MYB
- +  MYB-like sequence
- +  MYC
- +  Myb
- +  Myb-binding site
- +  O2-site
- +  STRE
- +  TATA-box
- +  TATC-box
- +  TC-rich repeats
- +  TCA-element
- +  TCCC-motif
- +  TGACG-motif
- +  Unnamed\_\_1
- +  Unnamed\_\_4
- +  Unnamed\_\_6
- +  W box
- +  WRE3
- +  as-1
- +  box S
- +  chs-CMA1a

Motifs Found

|   |                                                                                     |                      |
|---|-------------------------------------------------------------------------------------|----------------------|
| + |    |                      |
| + |    | A-box                |
| + |    | AAGAA-motif          |
| + |    | ABRE                 |
| + |    | AC-I                 |
| + |    | ARE                  |
| + |    | ATCT-motif           |
| + |    | AT~TATA-box          |
| + |    | Box 4                |
| + |    | CAAT-box             |
| + |    | CAT-box              |
| + |    | CCAAT-box            |
| + |    | CCGTCC motif         |
| + |    | CCGTCC-box           |
| + |    | CGTCA-motif          |
| + |    | ERE                  |
| + |    | G-Box                |
| + |    | GA-motif             |
| + |   | GATA-motif           |
| + |  | GT1-motif            |
| + |                                                                                     | LTR                  |
| + |  | MRE                  |
| + |  | MYB                  |
| + |  | MYB recognition site |
| + |  | MYB-like sequence    |
| + |  | Myc                  |
| + |  | O2-site              |
| + |  | P-box                |
| + |  | STRE                 |
| + |  | TATA                 |
| + |  | TATA-box             |
| + |  | TC-rich repeats      |
| + |  | TCT-motif            |
| + |  | TGA-element          |
| + |  | TGACG-motif          |
| + |  | Unnamed__2           |
| + |  | Unnamed__4           |
| + |  | W box                |
| + |  | WRE3                 |
| + |  | WUN-motif            |
| + |  | as-1                 |
| + |                                                                                     | box S                |

+  chs-Unit 1 ml

Motifs Found

- + 
- +  AAGAA-motif
- +  AE-box
- +  AP-1
- +  ARE
- +  AT~TATA-box
- +  Box 4
- +  Box II -like sequence
- +  CAAT-box
- +  CAT-box
- +  CGTCA-motif
- +  CTAG-motif
- +  DRE core
- +  GT1-motif
- +  MBS
- +  MRE
- +  MYB
- +  MYB-like sequence
- +  MYC
- +  Myb
- +  P-box
- +  STRE
- +  TATA-box
- +  TATC-box
- +  TCCC-motif
- +  TCT-motif
- +  TGA-element
- +  TGACG-motif
- +  Unnamed\_\_1
- +  Unnamed\_\_4
- +  W box
- +  WRE3
- +  WUN-motif
- +  as-1
- +  box S
- +  chs-CMA1a
- +  circadian



Motifs Found

- + 
- +  3-AF3 binding site
- +  4cl-CMA1b
- +  AAGAA-motif
- +  ABRE
- +  ABRE3a
- +  ABRE4
- +  ACE
- +  ARE
- +  AT-rich sequence
- +  AT~TATA-box
- +  Box 4
- +  CAAT-box
- +  CAT-box
- +  CGTCA-motif
- +  DRE core
- +  ERE
- +  G-Box
- +  G-box
- +  GATA-motif
- +  GCN4\_motif
- +  GT1-motif
- +  LTR
- +  MRE
- +  MSA-like
- +  MYB
- +  MYB-like sequence
- +  MYC
- +  STRE
- +  TATA
- +  TATA-box
- +  TC-rich repeats
- +  TCA
- +  TCA-element
- +  TGACG-motif
- +  Unnamed\_\_1
- +  Unnamed\_\_4
- +  Unnamed\_\_6
- +  as-1
- +  dOCT

Motifs Found

|   |                                                                                     |                   |
|---|-------------------------------------------------------------------------------------|-------------------|
| + |    |                   |
| + |    | AAGAA-motif       |
| + |    | ABRE              |
| + |    | ABRE3a            |
| + |    | ABRE4             |
| + |    | AE-box            |
| + |    | ARE               |
| + |    | ATC-motif         |
| + |    | AT~ABRE           |
| + |    | AT~TATA-box       |
| + |    | CAAT-box          |
| + |    | CAT-box           |
| + |    | CGTCA-motif       |
| + |    | DRE core          |
| + |    | DRE1              |
| + |    | G-box             |
| + |    | GA-motif          |
| + |    | GT1-motif         |
| + |   | Gap-box           |
| + |  | I-box             |
| + |                                                                                     | LTR               |
| + |  | MBS               |
| + |  | MRE               |
| + |  | MYB               |
| + |  | MYB-like sequence |
| + |  | MYC               |
| + |  | Myb               |
| + |  | Myb-binding site  |
| + |  | O2-site           |
| + |  | P-box             |
| + |  | STRE              |
| + |  | TATA-box          |
| + |  | TC-rich repeats   |
| + |  | TCA               |
| + |  | TCT-motif         |
| + |  | TGA-element       |
| + |  | TGACG-motif       |
| + |  | Unnamed__1        |
| + |  | Unnamed__4        |
| + |  | W box             |
| + |  | WRE3              |
| + |                                                                                     | WUN-motif         |

- +  as-1
- +  circadian

Motifs Found

|   |                                                                                     |                   |
|---|-------------------------------------------------------------------------------------|-------------------|
| + |    |                   |
| + |    | A-box             |
| + |    | AAGAA-motif       |
| + |    | ABRE              |
| + |    | ABRE3a            |
| + |    | ABRE4             |
| + |    | AC-II             |
| + |    | ARE               |
| + |    | AT-rich element   |
| + |    | AT~TATA-box       |
| + |    | Box 4             |
| + |    | CAAT-box          |
| + |    | CAT-box           |
| + |    | CCGTCC motif      |
| + |    | CCGTCC-box        |
| + |    | G-Box             |
| + |    | G-box             |
| + |    | GA-motif          |
| + |   | GC-motif          |
| + |  | GT1-motif         |
| + |                                                                                     | LAMP-element      |
| + |  | LTR               |
| + |  | MRE               |
| + |  | MYB               |
| + |  | MYB-like sequence |
| + |  | MYC               |
| + |  | Myb               |
| + |  | P-box             |
| + |  | STRE              |
| + |  | TATA              |
| + |  | TATA-box          |
| + |  | TATC-box          |
| + |  | TCA-element       |
| + |  | TCT-motif         |
| + |  | TGA-element       |
| + |  | Unnamed__1        |
| + |  | Unnamed__2        |
| + |  | Unnamed__4        |
| + |  | W box             |
| + |  | WRE3              |
| + |  | WUN-motif         |
| + |                                                                                     | box S             |

+  chs-CMA1a

Motifs Found

- + 
- +  AAGAA-motif
- +  ABRE
- +  ARE
- +  AT~TATA-box
- +  Box 4
- +  CAAT-box
- +  CAT-box
- +  CGTCA-motif
- +  ERE
- +  G-Box
- +  G-box
- +  GA-motif
- +  GATA-motif
- +  GT1-motif
- +  LTR
- +  MRE
- +  MYB
- +  MYB-like sequence
- +  MYC
- +  Myb
- +  P-box
- +  TATA
- +  TATA-box
- +  TC-rich repeats
- +  TCA
- +  TGACG-motif
- +  Unnamed\_\_1
- +  Unnamed\_\_2
- +  Unnamed\_\_4
- +  Unnamed\_\_6
- +  W box
- +  WUN-motif
- +  as-1
- +  circadian

Motifs Found

- + 
- +  AAGAA-motif
- +  ABRE
- +  AP-1
- +  ARE
- +  AT-rich element
- +  Box 4
- +  CAAT-box
- +  CAT-box
- +  CGTCA-motif
- +  DRE1
- +  ERE
- +  G-Box
- +  G-box
- +  GATA-motif
- +  GT1-motif
- +  LTR
- +  MBS
- +  MBSI
- +  MYB
- + MYB-like sequence
- +  MYC
- +  Myb
- +  Myb-binding site
- +  O2-site
- +  P-box
- +  STRE
- +  TATA-box
- +  TCA
- +  TGACG-motif
- +  Unnamed\_\_1
- +  Unnamed\_\_4
- +  Unnamed\_\_6
- +  WUN-motif
- +  as-1

Motifs Found

|   |                                                                                     |                      |
|---|-------------------------------------------------------------------------------------|----------------------|
| + |    |                      |
| + |    | A-box                |
| + |    | ABRE                 |
| + |    | ACE                  |
| + |    | ARE                  |
| + |    | AT-rich element      |
| + |    | ATCT-motif           |
| + |    | AT~TATA-box          |
| + |    | Box 4                |
| + |    | CAAT-box             |
| + |    | CCAAT-box            |
| + |    | CCGTCC motif         |
| + |    | CCGTCC-box           |
| + |    | DRE1                 |
| + |    | ERE                  |
| + |    | G-Box                |
| + |    | G-box                |
| + |    | GATA-motif           |
| + |   | GT1-motif            |
| + |  | I-box                |
| + |                                                                                     | LTR                  |
| + |  | MRE                  |
| + |  | MYB                  |
| + |  | MYB recognition site |
| + |  | MYC                  |
| + |  | Myb                  |
| + |  | Myb-binding site     |
| + |  | STRE                 |
| + |  | TATA-box             |
| + |  | TATC-box             |
| + |  | TCT-motif            |
| + |  | TGA-element          |
| + |  | Unnamed__4           |
| + |  | Unnamed__6           |
| + |  | WRE3                 |
| + |  | WUN-motif            |
| + |  | chs-CMA1a            |



Motifs Found

|   |                                                                                     |                   |
|---|-------------------------------------------------------------------------------------|-------------------|
| + |    |                   |
| + |    | AAGAA-motif       |
| + |    | ABRE              |
| + |    | ABRE3a            |
| + |    | ABRE4             |
| + |    | ACE               |
| + |    | AE-box            |
| + |    | ARE               |
| + |    | AT~TATA-box       |
| + |    | AuxRR-core        |
| + |    | Box 4             |
| + |    | Box II            |
| + |    | CAAT-box          |
| + |    | CGTCA-motif       |
| + |    | ERE               |
| + |    | G-box             |
| + |    | GARE-motif        |
| + |    | GATA-motif        |
| + |   | GT1-motif         |
| + |  | LTR               |
| + |                                                                                     | MBS               |
| + |  | MRE               |
| + |  | MYB               |
| + |  | MYB-like sequence |
| + |  | MYC               |
| + |  | Myb               |
| + |  | Myb-binding site  |
| + |  | O2-site           |
| + |  | RY-element        |
| + |  | STRE              |
| + |  | TATA-box          |
| + |  | TC-rich repeats   |
| + |  | TCA               |
| + |  | TCT-motif         |
| + |  | TGA-element       |
| + |  | TGACG-motif       |
| + |  | Unnamed__1        |
| + |  | Unnamed__10       |
| + |  | Unnamed__12       |
| + |  | Unnamed__14       |
| + |  | Unnamed__4        |
| + |                                                                                     | Unnamed__8        |

- +  W box
- +  WRE3
- +  as-1
- +  box S
- +  chs-CMA2a

Motifs Found

|   |                                                                                     |                    |
|---|-------------------------------------------------------------------------------------|--------------------|
| + |    |                    |
| + |    | 3-AF1 binding site |
| + |    | A-box              |
| + |    | AAGAA-motif        |
| + |    | ABRE               |
| + |    | ABRE3a             |
| + |    | ABRE4              |
| + |    | AE-box             |
| + |    | ARE                |
| + |    | AT-rich sequence   |
| + |    | ATC-motif          |
| + |    | AT~TATA-box        |
| + |    | AuxRR-core         |
| + |    | Box 4              |
| + |    | Box III            |
| + |    | CAAT-box           |
| + |    | CCGTCC motif       |
| + |    | CCGTCC-box         |
| + |   | CGTCA-motif        |
| + |  | ERE                |
| + |  | F-box              |
| + |  | G-Box              |
| + |  | G-box              |
| + |  | GA-motif           |
| + |  | GATA-motif         |
| + |  | GCN4_motif         |
| + |  | GT1-motif          |
| + |  | HD-Zip 3           |
| + |  | I-box              |
| + |  | LTR                |
| + |  | MBS                |
| + |  | MRE                |
| + |  | MYB                |
| + |  | MYB-like sequence  |
| + |  | MYC                |
| + |  | Myb                |
| + |  | Myb-binding site   |
| + |  | O2-site            |
| + |  | P-box              |
| + |  | STRE               |
| + |  | TATA               |
| + |  | TATA-box           |

- +  TCA-element
- +  TCT-motif
- +  TGA-box
- +  TGA-element
- +  TGACG-motif
- +  Unnamed\_\_1
- +  Unnamed\_\_2
- +  Unnamed\_\_4
- +  W box
- +  WUN-motif
- +  as-1
- +  chs-CMA1a
- +  circadian

Motifs Found

- + 
- +  AAGAA-motif
- +  ABRE
- +  ABRE3a
- +  ABRE4
- +  ARE
- +  AT~TATA-box
- +  Box 4
- +  CAAT-box
- +  CGTCA-motif
- +  DRE core
- +  G-box
- +  GA-motif
- +  GATA-motif
- +  GCN4\_motif
- +  GT1-motif
- +  LAMP-element
- +  MBS
- +  MBSI
- +  MRE
- +  MYB
- +  MYB-like sequence
- +  MYC
- +  Myb
- +  P-box
- +  TATA
- +  TATA-box
- +  TCA
- +  TCA-element
- +  TGA-element
- +  TGACG-motif
- +  Unnamed\_\_1
- +  Unnamed\_\_4
- +  W box
- +  as-1
- +  box S
- +  chs-CMA1a

Motifs Found

- + 
- +  AAGAA-motif
- +  ABRE
- +  ABRE3a
- +  ABRE4
- +  AT-rich sequence
- +  AT~TATA-box
- +  AuxRR-core
- +  Box 4
- +  CAAT-box
- +  CAT-box
- +  CCAAT-box
- +  CGTCA-motif
- +  G-Box
- +  G-box
- +  GATA-motif
- +  GT1-motif
- +  MBS
- +  MYB
- +  MYB recognition site
- +  MYB-like sequence
- +  MYC
- +  Myb
- +  Myb-binding site
- +  P-box
- +  STRE
- +  TATA-box
- +  TCA
- +  TCA-element
- +  TCT-motif
- +  TGA-element
- +  TGACG-motif
- +  Unnamed\_\_1
- +  Unnamed\_\_4
- +  Unnamed\_\_6
- +  W box
- +  WUN-motif
- +  as-1
- +  chs-CMA1a

# Motifs Found

|   |                                                                                     |                       |
|---|-------------------------------------------------------------------------------------|-----------------------|
| + |    |                       |
| + |    | ABRE                  |
| + |    | ABRE3a                |
| + |    | ABRE4                 |
| + |    | AC-I                  |
| + |    | AC-II                 |
| + |    | ARE                   |
| + |    | AT-rich sequence      |
| + |    | ATCT-motif            |
| + |    | AT~TATA-box           |
| + |    | Box 4                 |
| + |    | Box II -like sequence |
| + |    | CAAT-box              |
| + |    | CARE                  |
| + |    | CGTCA-motif           |
| + |    | CTAG-motif            |
| + |    | ERE                   |
| + |    | G-Box                 |
| + |  | G-box                 |
| + |  | GARE-motif            |
| + |  | GT1-motif             |
| + |  | Gap-box               |
| + |  | MBS                   |
| + |  | MRE                   |
| + |  | MYB                   |
| + |  | MYC                   |
| + |  | Myb                   |
| + |  | Myb-binding site      |
| + |  | O2-site               |
| + |  | P-box                 |
| + |  | SARE                  |
| + |  | STRE                  |
| + |  | TATA                  |
| + |  | TATA-box              |
| + |  | TC-rich repeats       |
| + |  | TCA                   |
| + |  | TCA-element           |
| + |  | TCCC-motif            |
| + |  | TCT-motif             |
| + |  | TGACG-motif           |
| + |  | Unnamed__1            |
| + |  | Unnamed__4            |

- +  WRE3
- +  WUN-motif
- +  as-1
- +  chs-Unit 1 m1



Motifs Found

- + 
- +  AAGAA-motif
- +  ABRE
- +  ABRE3a
- +  ABRE4
- +  ARE
- +  AT~TATA-box
- +  Box 4
- +  CAAT-box
- +  CAT-box
- +  CGTCA-motif
- +  DRE core
- +  G-Box
- +  G-box
- +  GA-motif
- +  GARE-motif
- +  GATA-motif
- +  I-box
- +  LAMP-element
- +  MBS
- +  MYB
- +  MYB-like sequence
- +  MYC
- +  Myb
- +  Myb-binding site
- +  Myc
- +  P-box
- +  RY-element
- +  STRE
- +  TATA-box
- +  TCT-motif
- +  TGACG-motif
- +  Unnamed\_\_1
- +  Unnamed\_\_4
- +  as-1
- +  circadian

Motifs Found

- + 
- +  ABRE
- +  AE-box
- +  ARE
- +  AT~TATA-box
- +  AuxRR-core
- +  Box 4
- +  CAAT-box
- +  CCAAT-box
- +  CGTCA-motif
- +  ERE
- +  F-box
- +  G-box
- +  GA-motif
- +  GATA-motif
- +  GT1-motif
- +  LTR
- +  MBS
- +  MRE
- +  MYB
- + MYB recognition site
- +  MYB-like sequence
- +  MYC
- +  Myb
- +  STRE
- +  TATA-box
- +  TC-rich repeats
- +  TCA
- +  TCT-motif
- +  TGA-box
- +  TGACG-motif
- +  Unnamed\_\_1
- +  Unnamed\_\_4
- +  W box
- +  WRE3
- +  WUN-motif
- +  as-1
- +  re2f-1
