# Supplementary material for: Characterization of the TCP Gene Family in Chrysanthemum nankingense and the Role of CnTCP4 in Cold Tolerance
Source: MDPI journal article supplement (doi:10.3390/plants11070936), 2022-03-30
Supplement: s1 [file s1]

Motifs Found

- + 
- +  AAGAA-motif
- +  AE-box
- +  ARE
- +  AT-rich sequence
- +  AT~TATA-box
- +  Box 4
- +  CAAT-box
- +  CAT-box
- +  CGTCA-motif
- +  ERE
- +  GCN4\_motif
- +  GT1-motif
- +  MBS
- +  MYB
- +  MYB-like sequence
- +  MYC
- +  Myb
- +  Myc
- +  O2-site
- +  TATA
- +  TATA-box
- +  TCA
- +  TCA-element
- +  TCT-motif
- +  TGA-element
- +  TGACG-motif
- +  Unnamed\_\_4
- +  Unnamed\_\_6
- +  W box
- +  WRE3
- +  WUN-motif
- +  as-1
- +  circadian

Motifs Found

- + 
- +  AAGAA-motif
- +  AE-box
- +  ARE
- +  AT~TATA-box
- +  Box 4
- +  CAAT-box
- +  CGTCA-motif
- +  ERE
- +  GA-motif
- +  GT1-motif
- +  Gap-box
- +  LAMP-element
- +  LTR
- +  MBS
- +  MYB
- +  MYB-like sequence
- +  MYC
- +  Myb
- +  Myb-binding site
- +  STRE
- +  TATA
- +  TATA-box
- +  TC-rich repeats
- +  TCA-element
- +  TCT-motif
- +  TGA-element
- +  TGACG-motif
- +  Unnamed\_\_1
- +  Unnamed\_\_4
- +  WRE3
- +  WUN-motif
- +  as-1

Motifs Found

- + 
- +  AAGAA-motif
- +  ABRE
- +  ABRE3a
- +  ABRE4
- +  ARE
- +  AT~TATA-box
- +  Box 4
- +  Box II
- +  CAAT-box
- +  CGTCA-motif
- +  DRE core
- +  ERE
- +  G-box
- +  GATA-motif
- +  GCN4\_motif
- +  HD-Zip 1
- +  I-box
- +  LAMP-element
- +  LTR
- +  MYB
- +  MYB-like sequence
- +  MYC
- +  Myc
- +  P-box
- +  STRE
- +  TATA
- +  TATA-box
- +  TC-rich repeats
- +  TCA
- +  TCT-motif
- +  TGACG-motif
- +  Unnamed\_\_1
- +  Unnamed\_\_4
- +  W box
- +  WRE3
- +  as-1

Motifs Found

- + 
- +  AAGAA-motif
- +  ABRE
- +  ABRE3a
- +  ABRE4
- +  ACE
- +  ARE
- +  AT~TATA-box
- +  Box 4
- +  CAAT-box
- +  CCAAT-box
- +  CGTCA-motif
- +  DRE1
- +  ERE
- +  G-box
- +  GT1-motif
- +  MBS
- +  MBSI
- +  MRE
- +  MYB
- + MYB recognition site
- +  MYB-like sequence
- +  Myb
- +  Myc
- +  P-box
- +  TATA-box
- +  TCA
- +  TCCC-motif
- +  TCT-motif
- +  TGA-element
- +  TGACG-motif
- +  Unnamed\_\_1
- +  Unnamed\_\_4
- +  Unnamed\_\_6
- +  W box
- +  WRE3
- +  WUN-motif
- +  as-1
- +  telo-box

Motifs Found

- + 
- +  AAGAA-motif
- +  ABRE
- +  ACE
- +  AP-1
- +  ARE
- +  AT~TATA-box
- +  AuxRR-core
- +  Box 4
- +  CAAT-box
- +  CAT-box
- +  CGTCA-motif
- +  ERE
- +  G-box
- +  GT1-motif
- +  I-box
- +  LTR
- +  MBSI
- +  MYB
- +  MYB-like sequence
- +  MYC
- +  Myb
- +  Myb-binding site
- +  Myc
- +  TATA
- +  TATA-box
- +  TC-rich repeats
- +  TCA
- +  TCT-motif
- +  TGA-element
- +  TGACG-motif
- +  Unnamed\_\_4
- +  W box
- +  as-1

Motifs Found

- + 
- +  AAGAA-motif
- +  ABRE
- +  ACE
- +  AE-box
- +  ARE
- +  AT-rich element
- +  AT~TATA-box
- +  CAAT-box
- +  CGTCA-motif
- +  G-Box
- +  G-box
- +  GARE-motif
- +  GATA-motif
- +  I-box
- +  LTR
- +  MBS
- +  MYB
- +  MYB-like sequence
- +  MYC
- +  Myb
- +  Myb-binding site
- +  Myc
- +  O2-site
- +  STRE
- +  TATA-box
- +  TATC-box
- +  TC-rich repeats
- +  TCA
- +  TCA-element
- +  TCT-motif
- +  TGACG-motif
- +  Unnamed\_\_1
- +  Unnamed\_\_4
- +  W box
- +  WRE3
- +  as-1
- +  chs-CMA2a
- +  circadian

Motifs Found

|   |                                                                                     |                      |
|---|-------------------------------------------------------------------------------------|----------------------|
| + |    |                      |
| + |    | ABRE                 |
| + |    | ABRE3a               |
| + |    | ABRE4                |
| + |    | AC-I                 |
| + |    | AE-box               |
| + |    | ARE                  |
| + |    | AT~TATA-box          |
| + |    | Box 4                |
| + |    | Box II               |
| + |    | CAAT-box             |
| + |    | CCAAT-box            |
| + |    | CGTCA-motif          |
| + |    | DRE core             |
| + |    | ERE                  |
| + |    | F-box                |
| + |    | G-Box                |
| + |    | G-box                |
| + |   | LTR                  |
| + |  | MBS                  |
| + |                                                                                     | MRE                  |
| + |  | MYB                  |
| + |  | MYB recognition site |
| + |  | MYB-like sequence    |
| + |  | MYC                  |
| + |  | Myb                  |
| + |  | O2-site              |
| + |  | P-box                |
| + |  | STRE                 |
| + |  | TATA                 |
| + |  | TATA-box             |
| + |  | TC-rich repeats      |
| + |  | TCA-element          |
| + |  | TGA-element          |
| + |  | TGACG-motif          |
| + |  | Unnamed__1           |
| + |  | Unnamed__2           |
| + |  | Unnamed__4           |
| + |  | Unnamed__6           |
| + |  | W box                |
| + |  | WRE3                 |
| + |                                                                                     | WUN-motif            |

+  as-1



Motifs Found

- + 
- +  AAGAA-motif
- +  ABRE
- +  AE-box
- +  ARE
- +  AT-rich element
- +  AT~TATA-box
- +  CAAT-box
- +  CGTCA-motif
- +  ERE
- +  G-box
- +  GARE-motif
- +  GC-motif
- +  I-box
- +  LTR
- +  MBS
- +  MRE
- +  MYB
- +  MYB-like sequence
- +  MYC
- +  Myb
- +  Myb-binding site
- +  STRE
- +  TATA-box
- +  TCA
- +  TCT-motif
- +  TGA-element
- +  TGACG-motif
- +  Unnamed\_\_1
- +  Unnamed\_\_2
- +  Unnamed\_\_4
- +  W box
- +  WRE3
- +  WUN-motif
- +  as-1
- +  circadian

# Motifs Found

|   |                                                                                     |                      |
|---|-------------------------------------------------------------------------------------|----------------------|
| + |    |                      |
| + |    | A-box                |
| + |    | AAGAA-motif          |
| + |    | ABRE                 |
| + |    | ARE                  |
| + |    | ATC-motif            |
| + |    | ATCT-motif           |
| + |    | AT~TATA-box          |
| + |    | AuxRR-core           |
| + |    | Box 4                |
| + |    | CAAT-box             |
| + |    | CAT-box              |
| + |    | CCAAT-box            |
| + |    | CCGTCC motif         |
| + |    | CCGTCC-box           |
| + |    | CGTCA-motif          |
| + |    | F-box                |
| + |    | G-Box                |
| + |   | G-box                |
| + |  | GATA-motif           |
| + |                                                                                     | GC-motif             |
| + |  | GT1-motif            |
| + |  | I-box                |
| + |  | LTR                  |
| + |  | MRE                  |
| + |  | MYB                  |
| + |  | MYB recognition site |
| + |  | MYB-like sequence    |
| + |  | MYC                  |
| + |  | Myb                  |
| + |  | Myb-binding site     |
| + |  | O2-site              |
| + |  | STRE                 |
| + |  | TATA-box             |
| + |  | TCT-motif            |
| + |  | TGACG-motif          |
| + |  | Unnamed__1           |
| + |  | Unnamed__2           |
| + |  | Unnamed__4           |
| + |  | W box                |
| + |  | WRE3                 |
| + |                                                                                     | as-1                 |

- +  box S
- +  re2f-1

Motifs Found

- + 
- +  AAGAA-motif
- +  ABRE
- +  ABRE2
- +  ARE
- +  AT~TATA-box
- +  Box 4
- +  CAAT-box
- +  CAT-box
- +  CCAAT-box
- +  CGTCA-motif
- +  DRE core
- +  DRE1
- +  G-Box
- +  G-box
- +  GT1-motif
- +  I-box
- +  LTR
- +  MYB
- +  MYB recognition site
- +  MYB-like sequence
- +  MYC
- +  Myb
- +  Myb-binding site
- +  P-box
- +  STRE
- +  TATA-box
- +  TCA-element
- +  TCCC-motif
- +  TCT-motif
- +  TGACG-motif
- +  Unnamed\_\_1
- +  Unnamed\_\_10
- +  Unnamed\_\_12
- +  Unnamed\_\_14
- +  Unnamed\_\_4
- +  Unnamed\_\_8
- +  WRE3
- +  as-1

Motifs Found

- + 
- +  3-AF1 binding site
- +  ABRE
- +  ARE
- +  Box 4
- +  CAAT-box
- +  CGTCA-motif
- +  G-Box
- +  G-box
- +  GARE-motif
- +  GT1-motif
- +  I-box
- +  LAMP-element
- +  MBS
- +  MYB
- +  MYC
- +  Myb
- +  Myb-binding site
- +  Myc
- +  O2-site
- +  P-box
- +  STRE
- +  TATA-box
- +  TATC-box
- +  TC-rich repeats
- +  TCA
- +  TCCC-motif
- +  TCT-motif
- +  TGACG-motif
- +  Unnamed\_\_1
- +  Unnamed\_\_2
- +  Unnamed\_\_4
- +  Unnamed\_\_6
- +  WRE3
- +  as-1

Motifs Found

- + 
- +  3-AF1 binding site
- +  AAGAA-motif
- +  ABRE
- +  ARE
- +  AT-rich element
- +  AT~TATA-box
- +  Box 4
- +  Box III
- +  CAAT-box
- +  CAT-box
- +  CGTCA-motif
- +  G-Box
- +  G-box
- +  GA-motif
- +  GATA-motif
- +  GT1-motif
- +  I-box
- +  MYB
- +  MYB-like sequence
- +  MYC
- +  Myb
- +  Myc
- +  NON
- +  O2-site
- +  P-box
- +  STRE
- +  TATA
- +  TATA-box
- +  TCA
- +  TCA-element
- +  TGA-element
- +  TGACG-motif
- +  Unnamed\_\_1
- +  Unnamed\_\_4
- +  Unnamed\_\_6
- +  WUN-motif
- +  as-1
- +  chs-CMA1a

Motifs Found

- + 
- +  3-AF1 binding site
- +  A-box
- +  AAGAA-motif
- +  ABRE
- +  ABRE2
- +  ABRE3a
- +  ABRE4
- +  AE-box
- +  ARE
- +  AT-rich element
- +  AT~TATA-box
- +  AuxRR-core
- +  Box 4
- +  Box II
- +  Box III
- +  CAAT-box
- +  CCGTCC motif
- +  CCGTCC-box
- +  CGTCA-motif
- +  CTAG-motif
- +  ERE
- +  G-Box
- +  G-box
- +  GCN4\_motif
- +  GT1-motif
- +  LAMP-element
- +  LTR
- +  MYB
- +  MYB-like sequence
- +  MYC
- +  Myb
- +  Myc
- +  O2-site
- +  P-box
- +  STRE
- +  TATA
- +  TATA-box
- +  TCA
- +  TCT-motif
- +  TGA-element
- +  TGACG-motif

- +  Unnamed\_\_1
- +  Unnamed\_\_4
- +  Unnamed\_\_6
- +  W box
- +  as-1



# Motifs Found

|   |                                                                                     |                   |
|---|-------------------------------------------------------------------------------------|-------------------|
| + |    |                   |
| + |    | A-box             |
| + |    | ABRE              |
| + |    | ABRE3a            |
| + |    | ABRE4             |
| + |    | AE-box            |
| + |    | ARE               |
| + |    | AT~TATA-box       |
| + |    | Box 4             |
| + |    | CAAT-box          |
| + |    | CCGTCC motif      |
| + |    | CCGTCC-box        |
| + |    | ERE               |
| + |    | G-Box             |
| + |    | G-box             |
| + |    | GT1-motif         |
| + |    | Gap-box           |
| + |    | I-box             |
| + |   | LTR               |
| + |  | MRE               |
| + |                                                                                     | MYB               |
| + |  | MYB-like sequence |
| + |  | MYC               |
| + |  | Myb               |
| + |  | STRE              |
| + |  | Sp1               |
| + |  | TATA              |
| + |  | TATA-box          |
| + |  | TC-rich repeats   |
| + |  | TCA               |
| + |  | TCT-motif         |
| + |  | TGA-element       |
| + |  | Unnamed__1        |
| + |  | Unnamed__4        |
| + |  | Unnamed__6        |
| + |  | W box             |
| + |  | WRE3              |
| + |  | WUN-motif         |
| + |  | chs-CMA1a         |
| + |  | chs-CMA2c         |
| + |  | circadian         |

Motifs Found

- + 
- +  ABRE
- +  ABRE3a
- +  ABRE4
- +  AE-box
- +  ARE
- +  AT~TATA-box
- +  AuxRR-core
- +  Box 4
- +  CAAT-box
- +  CGTCA-motif
- +  DRE core
- +  ERE
- +  G-Box
- +  G-box
- +  GARE-motif
- +  GT1-motif
- +  MBS
- +  MYB
- +  MYB-like sequence
- +  MYC
- +  Myb
- +  Myb-binding site
- +  Myc
- +  STRE
- +  TATA
- +  TATA-box
- +  TC-rich repeats
- +  TCA
- +  TCA-element
- +  TCT-motif
- +  TGA-element
- +  TGACG-motif
- +  Unnamed\_\_1
- +  Unnamed\_\_4
- +  Unnamed\_\_6
- +  W box
- +  WUN-motif
- +  as-1
- +  circadian

Motifs Found

|   |                                                                                     |                      |
|---|-------------------------------------------------------------------------------------|----------------------|
| + |    |                      |
| + |    | A-box                |
| + |    | AAGAA-motif          |
| + |    | ABRE                 |
| + |    | AE-box               |
| + |    | ARE                  |
| + |    | AT-rich element      |
| + |    | ATCT-motif           |
| + |    | AT~TATA-box          |
| + |    | Box 4                |
| + |    | Box II               |
| + |    | CAAT-box             |
| + |    | CCAAT-box            |
| + |    | CCGTCC motif         |
| + |    | CCGTCC-box           |
| + |    | CGTCA-motif          |
| + |    | ERE                  |
| + |    | G-Box                |
| + |   | GATA-motif           |
| + |  | GCN4_motif           |
| + |                                                                                     | GT1-motif            |
| + |  | MBS                  |
| + |  | MYB                  |
| + |  | MYB recognition site |
| + |  | MYB-like sequence    |
| + |  | MYC                  |
| + |  | Myb                  |
| + |  | O2-site              |
| + |  | OCT                  |
| + |  | P-box                |
| + |  | STRE                 |
| + |  | TATA                 |
| + |  | TATA-box             |
| + |  | TC-rich repeats      |
| + |  | TCA-element          |
| + |  | TCT-motif            |
| + |  | TGA-element          |
| + |  | TGACG-motif          |
| + |  | Unnamed__1           |
| + |  | Unnamed__2           |
| + |  | Unnamed__4           |
| + |                                                                                     | W box                |

- +  WRE3
- +  WUN-motif
- +  as-1

Motifs Found

- + 
- +  AAGAA-motif
- +  ABRE
- +  ABRE3a
- +  ABRE4
- +  AE-box
- +  ARE
- +  AT~TATA-box
- +  AuxRR-core
- +  Box 4
- +  CAAT-box
- +  CGTCA-motif
- +  DRE core
- +  DRE1
- +  ERE
- +  G-box
- +  GATA-motif
- +  GT1-motif
- +  MBS
- +  MYB
- + MYB-like sequence
- +  MYC
- +  Myb
- +  P-box
- +  STRE
- +  TATA-box
- +  TC-rich repeats
- +  TCA-element
- +  TCCC-motif
- +  TCT-motif
- +  TGA-element
- +  TGACG-motif
- +  Unnamed\_\_4
- +  W box
- +  WUN-motif
- +  as-1
- +  circadian

Motifs Found

- + 
- +  AAGAA-motif
- +  ABRE
- +  ABRE3a
- +  ABRE4
- +  ACE
- +  AE-box
- +  ARE
- +  AT-rich element
- +  AT~TATA-box
- +  Box 4
- +  CAAT-box
- +  CGTCA-motif
- +  ERE
- +  G-Box
- +  G-box
- +  GATA-motif
- +  GT1-motif
- +  MRE
- +  MYB
- +  MYC
- +  STRE
- +  TATA
- +  TATA-box
- +  TC-rich repeats
- +  TCA-element
- +  TCCC-motif
- +  TCT-motif
- +  TGA-element
- +  TGACG-motif
- +  Unnamed\_\_1
- +  Unnamed\_\_4
- +  Unnamed\_\_6
- +  W box
- +  WUN-motif
- +  as-1
- +  circadian

Motifs Found

- + 
- +  AAGAA-motif
- +  ABRE
- +  AC-I
- +  AE-box
- +  ARE
- +  AT1-motif
- +  AT~TATA-box
- +  CAAT-box
- +  CCAAT-box
- +  CGTCA-motif
- +  G-Box
- +  GATA-motif
- +  GT1-motif
- +  HD-Zip 1
- +  I-box
- +  LAMP-element
- +  LTR
- +  MBS
- +  MYB
- + MYB recognition site
- +  MYB-like sequence
- +  MYC
- +  Myb
- +  Myb-binding site
- +  STRE
- +  TATA
- +  TATA-box
- +  TCA-element
- +  TCT-motif
- +  TGA-element
- +  TGACG-motif
- +  Unnamed\_\_1
- +  Unnamed\_\_4
- +  Unnamed\_\_6
- +  W box
- +  as-1

Motifs Found

- + 
- +  A-box
- +  ABRE
- +  ARE
- +  AT~TATA-box
- +  AuxRR-core
- +  Box 4
- +  CAAT-box
- +  CAT-box
- +  CCGTCC motif
- +  CCGTCC-box
- +  CGTCA-motif
- +  ERE
- +  G-Box
- +  G-box
- +  GATA-motif
- +  GCN4\_motif
- +  GT1-motif
- +  HD-Zip 3
- +  LAMP-element
- + MBS
- +  MYB
- +  MYB-like sequence
- +  MYC
- +  Myb
- +  Myb-binding site
- +  O2-site
- +  P-box
- +  TATA-box
- +  TC-rich repeats
- +  TCA
- +  TCT-motif
- +  TGA-element
- +  TGACG-motif
- +  Unnamed\_\_1
- +  Unnamed\_\_2
- +  Unnamed\_\_4
- +  W box
- +  WRE3
- +  as-1
- +  chs-CMA1a



Motifs Found

- + 
- +  3-AF3 binding site
- +  AAGAA-motif
- +  ABRE
- +  ABRE3a
- +  ABRE4
- +  AC-II
- +  AP-1
- +  ARE
- +  AT-rich element
- +  AT~TATA-box
- +  Box 4
- +  CAAT-box
- +  CGTCA-motif
- +  CTAG-motif
- +  ERE
- +  G-Box
- +  G-box
- +  GARE-motif
- +  GT1-motif
- +  LAMP-element
- +  MRE
- +  MYB
- +  MYB-like sequence
- +  MYC
- +  Myb
- +  Myb-binding site
- +  Myc
- +  O2-site
- +  TATA
- +  TATA-box
- +  TCA-element
- +  TGA-element
- +  TGACG-motif
- +  Unnamed\_\_1
- +  Unnamed\_\_4
- +  Unnamed\_\_6
- +  W box
- +  WRE3
- +  WUN-motif
- +  as-1

# Motifs Found

|   |                                                                                     |                      |
|---|-------------------------------------------------------------------------------------|----------------------|
| + |    |                      |
| + |    | 3-AF3 binding site   |
| + |    | A-box                |
| + |    | AAGAA-motif          |
| + |    | ABRE                 |
| + |    | ABRE3a               |
| + |    | ABRE4                |
| + |    | AE-box               |
| + |    | ARE                  |
| + |    | ATCT-motif           |
| + |    | AT~TATA-box          |
| + |    | Box 4                |
| + |    | CAAT-box             |
| + |    | CCAAT-box            |
| + |    | CCGTCC motif         |
| + |    | CCGTCC-box           |
| + |    | CGTCA-motif          |
| + |    | ERE                  |
| + |   | G-box                |
| + |  | GA-motif             |
| + |                                                                                     | GARE-motif           |
| + |  | GATA-motif           |
| + |  | GCN4_motif           |
| + |  | GT1-motif            |
| + |  | I-box                |
| + |  | LAMP-element         |
| + |  | LTR                  |
| + |  | MYB                  |
| + |  | MYB recognition site |
| + |  | MYB-like sequence    |
| + |  | MYC                  |
| + |  | Myb                  |
| + |  | Myb-binding site     |
| + |  | Myc                  |
| + |  | RY-element           |
| + |  | TATA                 |
| + |  | TATA-box             |
| + |  | TCCC-motif           |
| + |  | TCT-motif            |
| + |  | TGACG-motif          |
| + |  | Unnamed__1           |
| + |                                                                                     | Unnamed__10          |

- +  Unnamed\_\_12
- +  Unnamed\_\_14
- +  Unnamed\_\_4
- +  Unnamed\_\_8
- +  W box
- +  WUN-motif
- +  as-1

Motifs Found

- + 
- +  AAGAA-motif
- +  ABRE
- +  AE-box
- +  ARE
- +  AT~TATA-box
- +  AuxRR-core
- +  Box 4
- +  Box III
- +  CAAT-box
- +  CGTCA-motif
- +  G-Box
- +  G-box
- +  GA-motif
- +  GCN4\_motif
- +  GT1-motif
- +  Gap-box
- +  I-box
- +  LTR
- +  MBSI
- + MRE
- +  MYB
- +  MYB-like sequence
- +  MYC
- +  Myb
- +  Myb-binding site
- +  Myc
- +  TATA
- +  TATA-box
- +  TC-rich repeats
- +  TCA
- +  TGACG-motif
- +  Unnamed\_\_1
- +  Unnamed\_\_4
- +  WRE3
- +  as-1

Motifs Found

|   |                                                                                     |                   |
|---|-------------------------------------------------------------------------------------|-------------------|
| + |    |                   |
| + |    | AAGAA-motif       |
| + |    | ABRE              |
| + |    | ABRE3a            |
| + |    | ABRE4             |
| + |    | ARE               |
| + |    | AT~TATA-box       |
| + |    | Box 4             |
| + |    | CAAT-box          |
| + |    | CAT-box           |
| + |    | CGTCA-motif       |
| + |    | CTAG-motif        |
| + |    | ERE               |
| + |    | G-Box             |
| + |    | G-box             |
| + |    | GATA-motif        |
| + |    | GT1-motif         |
| + |    | LAMP-element      |
| + |   | LTR               |
| + |  | MBS               |
| + |                                                                                     | MYB               |
| + |  | MYB-like sequence |
| + |  | MYC               |
| + |  | Myb               |
| + |  | Myb-binding site  |
| + |  | Myc               |
| + |  | TATA              |
| + |  | TATA-box          |
| + |  | TC-rich repeats   |
| + |  | TCA               |
| + |  | TCT-motif         |
| + |  | TGA-element       |
| + |  | TGACG-motif       |
| + |  | Unnamed__1        |
| + |  | Unnamed__10       |
| + |  | Unnamed__12       |
| + |  | Unnamed__14       |
| + |  | Unnamed__4        |
| + |  | Unnamed__8        |
| + |  | WUN-motif         |
| + |  | as-1              |
| + |                                                                                     | chs-CMA1a         |

+  circadian
